# Supplementary material for: 3′ Tth Endonuclease Cleavage Polymerase Chain Reaction (3TEC-PCR) Technology for Single-Base-Specific Multiplex Pathogen Detection using a Two-Oligonucleotide System
Source: MDPI journal article supplement (doi:10.3390/ijms22116061), 2021-06-04
Supplement: s1 [file s1]

## Supplemental Data

**Table S1: *Haemophilus influenzae* 3TEC-PCR wild-type assay specificity panel**

| Organism                                                                                                                             | Strain     | 3TEC-PCR Result |
|--------------------------------------------------------------------------------------------------------------------------------------|------------|-----------------|
| <b>Inclusivity Panel</b>                                                                                                             |            |                 |
| <i>H. influenzae</i> reference strains                                                                                               |            |                 |
| <i>H. influenzae</i> (b, Type Strain)                                                                                                | DSM 4690   | +               |
| <i>H. influenzae</i> (a)                                                                                                             | NCTC 8465  | +               |
| <i>H. influenzae</i> (b)                                                                                                             | DSM 10001  | +               |
| <i>H. influenzae</i> (b)                                                                                                             | DSM 11969  | +               |
| <i>H. influenzae</i> (b)                                                                                                             | DSM 11970  | +               |
| <i>H. influenzae</i> (b)                                                                                                             | DSM 24049  | +               |
| <i>H. influenzae</i> (c)                                                                                                             | NCTC 8469  | +               |
| <i>H. influenzae</i> (d)                                                                                                             | DSM 11121  | +               |
| <i>H. influenzae</i> (e)                                                                                                             | NCTC 8472  | +               |
| <i>H. influenzae</i> (f)                                                                                                             | DSM 10000  | +               |
| <b>Exclusivity Panel</b>                                                                                                             |            |                 |
| <i>Haemophilus</i> reference strains (excl. <i>H. influenzae</i> ) with <i>N. meningitidis</i> and <i>S. pneumoniae</i> type strains |            |                 |
| <i>H. actinomycescomitans</i>                                                                                                        | DSM 8324   | -               |
| <i>H. actinomycescomitans</i>                                                                                                        | DSM 11122  | -               |
| <i>H. aphrophilus</i>                                                                                                                | NCTC 11096 | -               |
| <i>H. avium</i>                                                                                                                      | DSM 18557  | -               |
| <i>H. ducreyi</i>                                                                                                                    | DSM 8925   | -               |
| <i>H. ducreyi</i>                                                                                                                    | NCTC 11479 | -               |
| <i>H. equigenitalis</i>                                                                                                              | DSM 10668  | -               |
| <i>H. felis</i>                                                                                                                      | DSM 21192  | -               |
| <i>H. haemoglobinophilus</i>                                                                                                         | DSM 21241  | -               |
| <i>H. haemolyticus</i>                                                                                                               | CCUG 12834 | -               |
| <i>H. haemolyticus</i>                                                                                                               | CCUG 15312 | -               |
| <i>H. haemolyticus</i>                                                                                                               | CCUG 15642 | -               |
| <i>H. haemolyticus</i>                                                                                                               | CCUG 24149 | -               |
| <i>H. haemolyticus</i>                                                                                                               | CCUG 34110 | -               |
| <i>H. haemolyticus</i>                                                                                                               | CCUG 36015 | -               |
| <i>H. haemolyticus</i>                                                                                                               | CCUG 36016 | -               |
| <i>H. haemolyticus</i>                                                                                                               | CDC-M19501 | -               |
| <i>H. haemolyticus</i>                                                                                                               | CDC-M21127 | -               |
| <i>H. haemolyticus</i>                                                                                                               | CDC-M21621 | -               |
| <i>H. haemolyticus</i>                                                                                                               | NCTC 10839 | -               |
| <i>H. paracuniculus</i>                                                                                                              | DSM 21452  | -               |
| <i>H. paragallinarum</i>                                                                                                             | DSM 18554  | -               |
| <i>H. parahaemolyticus</i>                                                                                                           | DSM 21417  | -               |
| <i>H. parainfluenzae</i>                                                                                                             | DSM 8978   | -               |
| <i>H. paraphrohaemolyticus</i>                                                                                                       | DSM 21451  | -               |
| <i>H. parasuis</i>                                                                                                                   | DSM 21448  | -               |
| <i>H. pittmaniae</i>                                                                                                                 | DSM 17240  | -               |
| <i>H. pittmaniae</i>                                                                                                                 | DSM 21203  | -               |
| <i>H. segnis</i>                                                                                                                     | NCTC 10977 | -               |
| <i>H. somnus</i>                                                                                                                     | CCUG 12839 | -               |
| <i>N. meningitidis</i> (type strain)                                                                                                 | NCTC 10025 | -               |
| <i>S. pneumoniae</i> (type strain)                                                                                                   | DSM 20566  | -               |

DSM, Leibniz Institute DSMZ - German Collection of Microorganisms and Cell Cultures; NCTC, National Collection of Type Cultures; CCUG, Culture Collection, University of Gothenburg, Sweden; CDC, Centre for Disease Control; +, positive; -, negative.

**Table S2: Synthetic DNA gBlocks Gene Fragment templates**

**SNP0 (without SNP):**

500 bp sectional copy of the *H. influenzae* *fucK* gene diagnostic target

GTTTGCTACTCGTGGAGAAATTTATGTCAGCGCATTACAACATATGGCAAATAAACTCAAAA  
ACGGTTTATCCGTGCTACATCAAGTCAGTCAGTTCCAAGCTAAAAGCTTAATTTGTGTTGGG  
GGTGGTTCAAAAAATGTATTGTGGAATCAAATCCGTGCAAACACCTTAAATTTACCGATTGA  
TGTTGTGGACATTTCTGAAAGTACTGTACTTGGTGCCGCAATGTTTACCTTTGCAGGCGTAGG  
CATTTACGAAAATGTAAACGCGGCACAGCAAGCGATGCAACCAACAAGAAAACGAATTTA  
CCCAAAGTAGAAGGAACAACAAAATGCTAAAAGGTATTCACCCAGCTCTTTCTCCTGAATT  
ACTAAAAACCTCGCCGAAATGGGGCATGGCGATGAGATAGTTCTAGCTGACGCCCATTTT  
CCCGCACATTCACCTACATAAAAAATGTAATACGTGCAGATGGTATATCTATAGATATTTTACT  
TGAAGCA

**SNP1 (with SNP):**

SNP0 sequence with an SNP in the target region of the *H. influenzae* wild-type forward primer/probe

GTTTGCTACTCGTGGAGAAATTTATGTCAGCGCATTACAACATATGGCAAATAAACTCAAAA  
ACGGTTTATCCGTGCTACATCAAGTCAGTCAGTTCCAAGCTAAAAGCTTAATTTGTGTTGGG  
GGTGGTTCAAAAAATGTATTGTGGAATCAAATCCGTGCAAACACCTTAAATTTACCGATTGA  
TGTTGTGGACATTTCTGAAAGTACTGTACTTGGTGCCGCAATGTTTACCTTTGCAGGCGTAGG  
CATTTACGAAAATGTAAACGCGGCACAGCAAGCGATGCAACCAACAAGAAAACGAATTTA  
CCCAAAGTAGAAGGAACAACAAAATGCTAAAAGGTATTCACCCAGCTCTTTCTCCTGAATT  
ACTAAAAACCTCGCCGAAATGGGGCATGGCGATGAGATAGTTCTAGCTGACGCCCATTTT  
CCCGCACATTCACCTACATAAAAAATGTAATACGTGCAGATGGTATATCTATAGATATTTTACT  
TGAAGCA

Bold and underline, SNP.

**Table S3: *H. influenzae* 3TEC-PCR wild-type assay limit of detection (LOD) probit analysis**

| Genome copy concentration                                       | Replicates tested / Replicates detected |
|-----------------------------------------------------------------|-----------------------------------------|
| 32                                                              | 12 / 12                                 |
| 16                                                              | 12 / 12                                 |
| 8                                                               | 12 / 12                                 |
| 4                                                               | 12 / 11                                 |
| 2                                                               | 12 / 10                                 |
| 1                                                               | 12 / 7                                  |
| <b>LOD with 95% probability: 4.1 genome copies per reaction</b> |                                         |
